# Supplementary material
Source: PubMed Central journal article supplement (PMC4231830)
Supplement: NIHMS586180-supplement-Supplementary_file.pdf [file NIHMS586180-supplement-Supplementary_file.pdf]

**SUPPLEMENT FOR: “COMBINING ISOTONIC  
REGRESSION AND EM ALGORITHM TO PREDICT  
GENETIC RISK UNDER MONOTONICITY  
CONSTRAINT” BY QIN ET AL**

TABLE S.1

*Results for Experiment 3 at  $t = 2$ : bias, empirical standard deviation (emp sd), average estimated standard deviation (est sd), and 95% coverage (95% cov) of estimators at different censoring rates. Results based on 500 simulations with sample size  $n = 500$ .*

| Estimator      | $F_1(t) = 0.4287$    |        |        |         | $F_2(t) = 0.6886$ |        |        |         |
|----------------|----------------------|--------|--------|---------|-------------------|--------|--------|---------|
|                | bias                 | emp sd | est sd | 95% cov | bias              | emp sd | est sd | 95% cov |
|                | Censoring rate = 0%  |        |        |         |                   |        |        |         |
| EM-PAVA        | -0.0018              | 0.0544 | 0.0473 | 0.9460  | -0.0017           | 0.0428 | 0.0414 | 0.9740  |
| Oracle EFFAIPW | -0.0019              | 0.0542 | 0.0478 | 0.9400  | -0.0014           | 0.0422 | 0.0413 | 0.9760  |
| type I NPMLE   | -0.0093              | 0.0838 | 0.0594 | 0.9340  | -0.0096           | 0.0789 | 0.0634 | 0.9500  |
| type II NPMLE  | 0.0503               | 0.0481 | 0.0348 | 0.6720  | -0.0635           | 0.0404 | 0.0280 | 0.4600  |
|                | Censoring rate = 20% |        |        |         |                   |        |        |         |
| EM-PAVA        | -0.0019              | 0.0538 | 0.0506 | 0.9280  | -0.0016           | 0.0460 | 0.0438 | 0.9460  |
| Oracle EFFAIPW | 0.0031               | 0.0568 | 0.0503 | 0.9400  | -0.0005           | 0.0471 | 0.0436 | 0.9460  |
| type I NPMLE   | -0.0056              | 0.0781 | 0.0621 | 0.9320  | -0.0073           | 0.0844 | 0.0654 | 0.9320  |
| type II NPMLE  | -0.0110              | 0.0838 | 0.0413 | 0.6320  | -0.0045           | 0.0638 | 0.0356 | 0.7700  |
|                | Censoring rate = 40% |        |        |         |                   |        |        |         |
| EM-PAVA        | -0.0028              | 0.0587 | 0.0560 | 0.9320  | -0.0017           | 0.0513 | 0.0484 | 0.9340  |
| Oracle EFFAIPW | 0.0031               | 0.0713 | 0.0558 | 0.9160  | 0.0008            | 0.0572 | 0.0489 | 0.9160  |
| type I NPMLE   | -0.0084              | 0.0870 | 0.0672 | 0.9260  | -0.0118           | 0.0926 | 0.0716 | 0.9100  |
| type II NPMLE  | -0.0356              | 0.0991 | 0.0432 | 0.5300  | 0.0222            | 0.0795 | 0.0385 | 0.7220  |

TABLE S.2

Results for Experiment 3 across a range of time points: integrated absolute bias, average pointwise variance, and average 95% coverage probabilities of estimators at different censoring rates. Results based on 500 simulations with sample size  $n = 500$ .

| Estimator                           | Censoring rate |          |          |          |          |          |
|-------------------------------------|----------------|----------|----------|----------|----------|----------|
|                                     | 0%             |          | 20%      |          | 40%      |          |
|                                     | $F_1(t)$       | $F_2(t)$ | $F_1(t)$ | $F_2(t)$ | $F_1(t)$ | $F_2(t)$ |
| Integrated absolute bias*           |                |          |          |          |          |          |
| EM-PAVA                             | 0.0591         | 0.0065   | 0.0755   | 0.0095   | 0.1653   | 0.0249   |
| Oracle EFFAIPW                      | 0.0107         | 0.0027   | 0.0865   | 0.0086   | 0.1220   | 0.0525   |
| type I NPMLE                        | 0.0296         | 0.0093   | 0.1649   | 0.0169   | 0.9244   | 0.0670   |
| type II NPMLE                       | 0.4574         | 0.2227   | 0.1559   | 0.1301   | 0.1123   | 0.0274   |
| Average pointwise variance*         |                |          |          |          |          |          |
| EM-PAVA                             | 0.0018         | 0.0005   | 0.0026   | 0.0005   | 0.0053   | 0.0009   |
| Oracle EFFAIPW                      | 0.0021         | 0.0006   | 0.0036   | 0.0007   | 0.0097   | 0.0021   |
| type I NPMLE                        | 0.0027         | 0.0013   | 0.0039   | 0.0014   | 0.0108   | 0.0037   |
| type II NPMLE                       | 0.0009         | 0.0002   | 0.0019   | 0.0003   | 0.0042   | 0.0005   |
| Average 95% coverage probabilities* |                |          |          |          |          |          |
| EM-PAVA                             | 0.9425         | 0.9458   | 0.9482   | 0.9457   | 0.9492   | 0.9416   |
| Oracle EFFAIPW                      | 0.9477         | 0.9478   | 0.9514   | 0.9483   | 0.9468   | 0.9457   |
| type I NPMLE                        | 0.8978         | 0.9525   | 0.8996   | 0.9459   | 0.8158   | 0.9357   |
| type II NPMLE                       | 0.6614         | 0.4011   | 0.9288   | 0.7610   | 0.9459   | 0.9349   |

\*Computed over (0,10) for  $F_1(t)$  and over (0, 5) for  $F_2(t)$ .

TABLE S.3

Empirical rejection rates for Experiment 3. Test of  $F_1(t) = F_2(t)$  over the entire time range was performed using a permutation test with 1000 permutations. Results based on 1000 simulations (for test under  $H_0$ ) and 200 simulations (for test under  $H_1$ ), with sample size  $n = 500$  and 40% censoring (under  $H_1$ ).

| Estimator      | Nominal Levels                |        |        |        |                                  |        |        |        |
|----------------|-------------------------------|--------|--------|--------|----------------------------------|--------|--------|--------|
|                | 0.01                          | 0.05   | 0.10   | 0.20   | 0.01                             | 0.05   | 0.10   | 0.20   |
|                | Under $H_0 : F_1(t) = F_2(t)$ |        |        |        | Under $H_1 : F_1(t) \neq F_2(t)$ |        |        |        |
| EM-PAVA        | 0.0090                        | 0.0520 | 0.0970 | 0.1950 | 0.6450                           | 0.7950 | 0.8650 | 0.9400 |
| Oracle EFFAIPW | 0.0100                        | 0.0500 | 0.0980 | 0.1860 | 0.5000                           | 0.6500 | 0.7450 | 0.8350 |
| type I NPMLE   | 0.0080                        | 0.0370 | 0.0980 | 0.1930 | 0.2800                           | 0.4800 | 0.6200 | 0.7600 |
| type II NPMLE  | 0.0080                        | 0.0480 | 0.0940 | 0.1980 | 0.5100                           | 0.7050 | 0.7850 | 0.8450 |

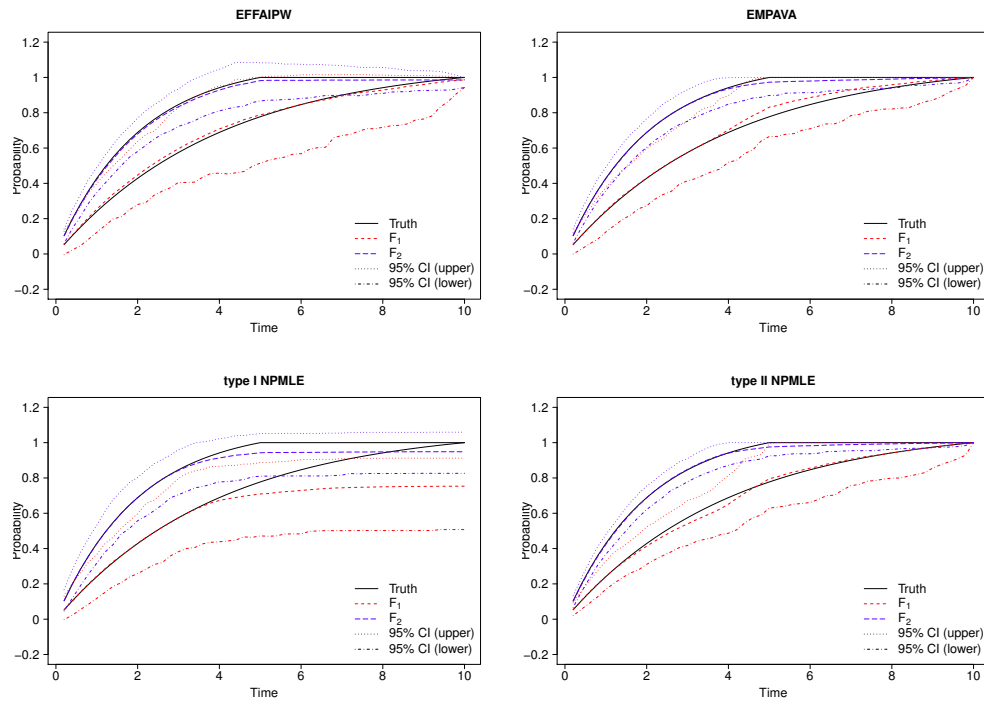

FIG S.1. *Experiment 3. True cumulative distribution function and the mean of 500 simulations along with 95% confidence band (dotted) for the four proposed estimators. Sample size is 500, censoring rate is 40%.*
